# Supplementary material for: Conformational changes in the essential E. coli septal cell wall synthesis complex suggest an activation mechanism
Source: PubMed Central journal article supplement (PMC10390529; doi:10.1038/s41467-023-39921-4), 2023-07-31
Supplement: 41467_2023_39921_MOESM3_ESM.pdf [file 41467_2023_39921_MOESM3_ESM.pdf]

## Description of Additional Supplementary Files:

**Supplementary Data 1.** Spreadsheet summarizing the frequency of all persistent (>10% of the last 500 ns of simulation) hydrogen bonds formed at important interfaces in the complex. Each sheet corresponds to a different interface, and hydrogen bond frequencies are listed for each system simulated.

**Supplementary Data 2.** Directory containing coordinates for predicted structures and conformers after 1 microsecond of MD simulation, both for the protein and for both protein and membrane.

**Supplementary Movie 1.** Epifluorescence time-lapse imaging of single Halo-FtsB molecule in M9-glucose, corresponding to Figure 1A (top). Scale bar, 0.5  $\mu\text{m}$ .

**Supplementary Movie 2.** Epifluorescence time-lapse imaging of single Halo-FtsB molecule in M9-glucose, corresponding to Figure 1A (bottom). Scale bar, 0.5  $\mu\text{m}$ .

**Supplementary Movie 3.** One-microsecond simulation of the FtsQLBWI complex.

**Supplementary Movie 4.** One-microsecond simulation of FtsWI embedded in a lipid bilayer. Phosphorus (dark purple) and oxygen (light purple) atoms of the polar head groups are shown.

**Supplementary Movie 5.** One microsecond simulation of the FtsQLBWI complex with bound activator FtsN.
